# Supplementary material for: Metabolomic Markers in Attention-Deficit/Hyperactivity Disorder (ADHD) among Children and Adolescents—A Systematic Review
Source: MDPI journal article supplement (doi:10.3390/ijms25084385), 2024-04-16
Supplement: s1 [file s1]

**Supplementary File S 1: Search strings adapted for each database.**

- PubMed: ((metabolom\*) OR (metabolit\*) OR (omics) OR (plasma) OR (serum) OR (urin\*)) AND ((adhd[Title/Abstract]) OR (hyperkine\*[Title/Abstract]) OR (attention defic\*[Title/Abstract])) AND ((children) OR (adolescent\*)) => **1563 results**
- WoS: (TS=(metabolom\*) OR TS=(metabolit\*) OR TS=(omics) OR TS=(plasma) OR TS=(serum) OR TS=(urin\*)) AND (TS=(ADHD) OR TS=(hyperkine\*) OR TS=("attention defic"\*)) AND (TS=(children) OR TS=(adolescent\*)) => **2839 results**
