# Supplementary material for: Metabolomic Markers in Attention-Deficit/Hyperactivity Disorder (ADHD) among Children and Adolescents—A Systematic Review
Source: MDPI journal article supplement (doi:10.3390/ijms25084385), 2024-04-16
Supplement: s1 [file s1]

**Supplementary Table S 2: Summary of the main findings.**

| Biomarker                                                       | ↑                                                    | No difference                                                                                                           | ↓                                                                                                                                   |
|-----------------------------------------------------------------|------------------------------------------------------|-------------------------------------------------------------------------------------------------------------------------|-------------------------------------------------------------------------------------------------------------------------------------|
| <b>Oxidative stress</b>                                         |                                                      |                                                                                                                         |                                                                                                                                     |
| MDA                                                             | 2 studies: Ceylan, 2010; Elhady, 2019                | 4 studies: Avcil, 2021; Kilany, 2022 (compared LD + ADHD vs. LD); Nasim, 2019; Verlaet, 2019                            | 2 studies: Oztop, 2012; Spahis, 2008                                                                                                |
| 8-OHdG                                                          |                                                      | 2 studies: Simsek, 2016; Verlaet, 2019(u)                                                                               | 1 study: Oztop, 2012                                                                                                                |
| Total thiols                                                    | 1 study: Avcil, 2017                                 | 1 study: Oztop, 2012                                                                                                    | 2 studies: Guney, 2015; Öğütlü, 2020                                                                                                |
| NO pool                                                         | 2 studies: Ceylan, 2010; Jansen, 2020                |                                                                                                                         |                                                                                                                                     |
| ADMA                                                            | 1 study: Doneray, 2022                               |                                                                                                                         | 1 study: Jansen, 2020                                                                                                               |
| GSH                                                             | 1 study: Verlaet, 2019                               |                                                                                                                         | 1 study: Nasim, 2019                                                                                                                |
| <b>Lipid metabolism – selected markers; detailed in Table 2</b> |                                                      |                                                                                                                         |                                                                                                                                     |
| DHA                                                             | 1 study: Spahis, 2008                                | 4 studies: Chen, 2004; Gow, 2013; Grazioli, 2019; Henríquez-Henríquez, 2015a                                            | 8 studies: Chen, 2004; Colter, 2008; Crippa, 2018; Miklavcic, 2023; Mitchel, 1987; Parletta, 2016; Stevens, 1995; Yonezawa, 2018    |
| EPA                                                             | 1 study: Spahis, 2008                                | 7 studies: Chen, 2004; Colter, 2008; Crippa, 2018; Gow, 2013; Grazioli, 2019; Henríquez-Henríquez, 2015a; Mitchel, 1987 | 3 studies: Parletta, 2016; Stevens, 1995; Yonezawa, 2018                                                                            |
| AA                                                              | 1 study: Spahis, 2008                                | 5 studies: Chen, 2004; Crippa, 2018; Gow, 2013; Henríquez-Henríquez, 2015a; Spahis, 2008                                | 8 studies: Chen, 2004; Grazioli, 2019; Miklavcic, 2023; Mitchel, 1987; Parletta, 2016; Stevens, 1995; Stevens, 1996; Yonezawa, 2018 |
| n-3                                                             | 3 studies: Crippa, 2018; Spahis, 2008; Stevens, 1995 | 5 studies: Chen, 2004; Gow, 2013; Henríquez-Henríquez, 2015a; Spahis, 2008; Stevens, 1996                               | 2 studies: Chen, 2004; Colter, 2008                                                                                                 |
| n-6                                                             | 0 studies                                            | 7 studies: Chen, 2004; Colter, 2008; Gow, 2013; Henríquez-Henríquez, 2015a; Spahis, 2008; Stevens 1995; Stevens, 1996   | 0 studies                                                                                                                           |
| <b>Amino acids metabolism</b>                                   |                                                      |                                                                                                                         |                                                                                                                                     |
| Homocysteine                                                    | 1 study: Yektaş, 2019                                | 1 study: Rucklidge, 2019                                                                                                | 1 study: Altun, 2018                                                                                                                |
| Phe, Tyr                                                        |                                                      | 2 studies: Bergwerff, 2016(u+b); Skalny, 2021                                                                           | 2 studies: Bornstein, 1990 (only in plasma); Baker, 1991 (only in plasma, only Phe)                                                 |
| Hydroxyproline                                                  | 1 study: Skalny, 2021                                |                                                                                                                         |                                                                                                                                     |
| L-cystine                                                       | 1 study: Wang, 2021b                                 |                                                                                                                         |                                                                                                                                     |

|                                     |                                                                              |                                                                                               |                                                |
|-------------------------------------|------------------------------------------------------------------------------|-----------------------------------------------------------------------------------------------|------------------------------------------------|
| Ammonia, lactate                    | 1 study: Hasan, 2016                                                         |                                                                                               |                                                |
| <b>Kynurenine pathway</b>           |                                                                              |                                                                                               |                                                |
| Trp                                 | 3 studies: Dolina, 2014(u); Evangelisti, 2017; Hoshino, 1985 (only free Trp) | 4 studies: Bergwerff, 2016(u+b); Molina-Carballo, 2021(u+b); Sağlam, 2021; Skalny, 2021       | 1 study: Bornstein, 1990                       |
| KYN                                 | 2 studies: Evangelisti, 2017; Sağlam, 2021                                   | 3 studies: Kilany, 2022 (compared LD + ADHD vs. LD); Molina-Carballo, 2021(u+b); Oades, 2010a |                                                |
| 3-OH-KYN                            | 1 study: Dolina, 2014(u)                                                     |                                                                                               | 2 studies: Oades, 2010a; Sağlam, 2021          |
| AA                                  |                                                                              | 1 study: Molina-Carballo, 2021(u+b)                                                           | 1 study: Evangelisti, 2017                     |
| KA                                  | 1 study: Dolina, 2014 (urine)                                                | 1 study: Sağlam, 2021                                                                         | 1 study: Evangelisti, 2017                     |
| QA                                  |                                                                              | 2 studies: Evangelisti, 2017; Molina-Carballo, 2021(u+b)                                      |                                                |
| Xanthurenic acid                    |                                                                              | 1 study: Molina-Carballo, 2021(u+b)                                                           | 1 study: Evangelisti, 2017                     |
| <b>Neurotransmitters metabolism</b> |                                                                              |                                                                                               |                                                |
| MHPG                                | 1 study: Khan, 1981(u)                                                       | 2 studies: Baker, 1993(u); Oades, 1998(u)                                                     | 1 study: Shekim, 1987(u)                       |
| DOPEG                               |                                                                              |                                                                                               | 1 study: Hanna, 1996(u)                        |
| Metanephrine, NME                   | 1 study: Konrad, 2003(u) (only NME)                                          | 2 studies: Baker, 1993(u); Khan, 1981(u)                                                      |                                                |
| Homovanillic acid                   |                                                                              | 1 study: Oades, 1998(u)                                                                       | 1 study: Shekim, 1987(u)                       |
| 5-HIAA                              | 1 study: Oades, 1998(u)                                                      | 1 study: Oades, 2010a                                                                         | 2 studies: Chatterjee, 2022; Moriarty, 2011(u) |
| TIQ                                 | 1 study: Roessner, 2007(u)                                                   |                                                                                               |                                                |
| <b>Other metabolic processes</b>    |                                                                              |                                                                                               |                                                |
| 6-OH-MS                             | 1 study: Büber, 2016(u)                                                      |                                                                                               |                                                |
| 6-S-aMT                             |                                                                              | 1 study: Molina-Carballo, 2013(u)                                                             |                                                |
| Indolamines                         |                                                                              | 1 study: Fernández-López, 2020(u+b)                                                           |                                                |
| Agmatine                            | 1 study: Sari, 2020                                                          |                                                                                               |                                                |

(u) – urine levels; (u+b) – both urine and blood levels; if not specified, the reported results refer to levels in serum/plasma/RBCs
