# Supplementary material for: Metabolomic Markers in Attention-Deficit/Hyperactivity Disorder (ADHD) among Children and Adolescents—A Systematic Review
Source: MDPI journal article supplement (doi:10.3390/ijms25084385), 2024-04-16
Supplement: s1 [file s1]

**Supplementary Table S 1: Newcastle-Ottawa Scale Rating.**

**Quality assessment of the included studies using the Newcastle-Ottawa Scale.**

|                  | SELECTION (max. 4 stars) |    |                             |    |                    |    |                     |    | COMPARABILITY (max. 2 stars) |    |            |    | OUTCOME (max. 2 stars) |    |                        |    | TOTAL (max. 8 stars) |    | Traffic Light plot |
|------------------|--------------------------|----|-----------------------------|----|--------------------|----|---------------------|----|------------------------------|----|------------|----|------------------------|----|------------------------|----|----------------------|----|--------------------|
| Study            | Case definition          |    | Representativeness of cases |    | Controls selection |    | Controls definition |    | Age, gender                  |    | Additional |    | Assessment             |    | Statistical procedures |    |                      |    |                    |
|                  | R1                       | R2 | R1                          | R2 | R1                 | R2 | R1                  | R2 | R1                           | R2 | R1         | R2 | R1                     | R2 | R1                     | R2 | R1                   | R2 |                    |
| Oxidative stress |                          |    |                             |    |                    |    |                     |    |                              |    |            |    |                        |    |                        |    |                      |    |                    |
| Avcil, 2017      | ★                        | ★  | ★                           | ★  |                    | ★  | ★                   | ★  | ★                            | ★  | ★          | ★  | ★                      | ★  | ★                      | ★  | 7                    | 8  | ++++               |
| Avcil, 2021      | ★                        | ★  | ★                           | ★  | ★                  |    | ★                   | ★  | ★                            | ★  | ★          | ★  | ★                      | ★  | ★                      | ★  | 8                    | 7  | ++++               |
| Ceylan, 2010     | ★                        | ★  | ★                           | ★  |                    |    | ★                   | ★  | ★                            | ★  | ★          | ★  |                        | ★  | ★                      | ★  | 6                    | 7  | ++++               |
| Doneray, 2022    | ★                        | ★  | ★                           | ★  | ★                  |    | ★                   | ★  | ★                            | ★  | ★          |    | ★                      | ★  | ★                      | ★  | 8                    | 6  | ++++               |
| Elhady, 2019     | ★                        | ★  |                             |    | ★                  | ★  |                     |    | ★                            | ★  | ★          | ★  | ★                      | ★  | ★                      | ★  | 6                    | 6  | -+++               |
| Guney, 2015      | ★                        | ★  | ★                           | ★  |                    |    | ★                   | ★  | ★                            | ★  |            |    | ★                      | ★  | ★                      | ★  | 6                    | 6  | + - ++             |
| Jansen, 2020     | ★                        | ★  | ★                           | ★  |                    |    |                     | ★  | ★                            | ★  | ★          | ★  | ★                      | ★  | ★                      | ★  | 6                    | 7  | - +++              |
| Nasim, 2019      | ★                        | ★  |                             |    |                    |    | ★                   | ★  |                              |    |            |    | ★                      | ★  | ★                      | ★  | 4                    | 4  | - + - -            |
| Öğütlü, 2020     | ★                        | ★  | ★                           | ★  | ★                  | ★  | ★                   | ★  | ★                            | ★  |            | ★  | ★                      | ★  |                        | ★  | 6                    | 8  | ++++               |
| Oztop, 2012      | ★                        | ★  | ★                           |    |                    | ★  | ★                   | ★  | ★                            |    | ★          | ★  | ★                      | ★  | ★                      | ★  | 7                    | 6  | - +++              |
| Simsek, 2016     | ★                        | ★  | ★                           | ★  | ★                  |    | ★                   | ★  | ★                            | ★  | ★          | ★  | ★                      | ★  | ★                      | ★  | 8                    | 7  | ++++               |
| Verlaet, 2019    | ★                        | ★  | ★                           | ★  |                    | ★  |                     |    | ★                            | ★  | ★          | ★  | ★                      | ★  | ★                      | ★  | 6                    | 7  | - +++              |
| Lipid metabolism |                          |    |                             |    |                    |    |                     |    |                              |    |            |    |                        |    |                        |    |                      |    |                    |
| Bekaroğlu, 1996  | ★                        | ★  | ★                           | ★  |                    |    |                     |    | ★                            | ★  |            |    |                        | ★  | ★                      |    | 4                    | 4  | - - - -            |
| Chen, 2004       | ★                        | ★  | ★                           | ★  | ★                  | ★  |                     |    | ★                            | ★  | ★          |    | ★                      | ★  | ★                      | ★  | 7                    | 7  | ++++               |
| Colter, 2008     | ★                        | ★  |                             | ★  | ★                  | ★  |                     | ★  | ★                            | ★  | ★          |    | ★                      | ★  |                        | ★  | 5                    | 7  | ++++               |

|                            |   |   |   |   |   |   |   |   |   |   |   |   |   |   |   |   |   |   |   |   |   |   |
|----------------------------|---|---|---|---|---|---|---|---|---|---|---|---|---|---|---|---|---|---|---|---|---|---|
| Crippa, 2018               | ★ | ★ | ★ | ★ | ★ | ★ | ★ | ★ | ★ | ★ | ★ | ★ | ★ | ★ | ★ | ★ | 8 | 8 | + | + | + | + |
| Gow, 2013                  | ★ | ★ |   |   | ★ | ★ | ★ | ★ |   |   | ★ | ★ | ★ | ★ | ★ | ★ | 6 | 7 | + | - | + | + |
| Grazioli, 2019             | ★ | ★ |   | ★ | ★ | ★ | ★ | ★ | ★ | ★ | ★ | ★ | ★ |   |   | ★ | 6 | 8 | + | + | + | + |
| Henríquez-Henríquez, 2015a | ★ | ★ |   |   |   | ★ |   | ★ |   |   | ★ |   | ★ | ★ | ★ | ★ | 4 | 5 | - | + | + | - |
| Henríquez-Henríquez, 2015b | ★ | ★ |   |   |   | ★ |   | ★ |   |   |   | ★ | ★ | ★ | ★ |   | 3 | 5 | - | + | + | - |
| Kozielec-Oracka, 2022      |   |   |   |   |   |   |   |   |   |   | ★ | ★ |   |   | ★ |   | 1 | 2 | + | - | + | + |
| Miklavcic, 2023            | ★ | ★ |   |   |   |   |   |   |   | ★ | ★ |   |   | ★ | ★ | ★ | 4 | 3 | + | - | + | - |
| Mitchell, 1987             |   |   | ★ |   | ★ | ★ |   |   | ★ | ★ |   |   | ★ | ★ |   | ★ | 4 | 4 | - | - | + | - |
| Parletta, 2016             |   |   |   | ★ | ★ |   | ★ |   | ★ |   |   |   | ★ | ★ | ★ | ★ | 5 | 4 | - | - | + | - |
| Spahis, 2008               | ★ | ★ | ★ | ★ |   | ★ | ★ | ★ | ★ | ★ |   | ★ | ★ | ★ | ★ | ★ | 6 | 8 | + | + | + | + |
| Stevens, 1995              | ★ | ★ |   |   | ★ | ★ |   |   | ★ |   | ★ |   | ★ | ★ | ★ | ★ | 6 | 4 | - | - | + | - |
| Stevens, 1996              |   | ★ |   |   |   | ★ |   |   | ★ |   |   |   | ★ | ★ | ★ | ★ | 3 | 4 | + | + | + | - |
| Wang 2019b                 | ★ | ★ | ★ | ★ | ★ | ★ | ★ | ★ | ★ | ★ | ★ |   | ★ | ★ | ★ | ★ | 8 | 7 | + | + | + | + |
| Yonezawa, 2018             | ★ | ★ | ★ |   |   |   |   |   |   |   |   |   | ★ | ★ | ★ |   | 4 | 2 | - | + | + | - |
| Aminoacids metabolism      |   |   |   |   |   |   |   |   |   |   |   |   |   |   |   |   |   |   |   |   |   |   |
| Altun, 2018                | ★ | ★ | ★ | ★ | ★ | ★ | ★ | ★ | ★ | ★ |   |   | ★ | ★ | ★ | ★ | 7 | 7 | + | - | + | + |
| Bornstein, 1990            | ★ | ★ | ★ | ★ |   | ★ | ★ | ★ | ★ |   |   | ★ |   |   | ★ | ★ | 5 | 6 | + | - | - | - |
| Bergwerff, 2016            | ★ | ★ |   | ★ | ★ |   | ★ | ★ |   |   |   | ★ | ★ | ★ | ★ | ★ | 5 | 6 | + | - | + | - |
| Hasan, 2016                |   | ★ | ★ |   |   |   |   |   |   |   |   |   |   | ★ | ★ |   | 2 | 2 | + | + | - | + |

|                                     |   |   |   |   |   |   |   |   |   |   |   |   |   |   |   |   |   |   |           |
|-------------------------------------|---|---|---|---|---|---|---|---|---|---|---|---|---|---|---|---|---|---|-----------|
| Hubers, 2024                        | ★ | ★ | ★ | ★ |   |   |   |   | ★ | ★ | ★ | ★ | ★ | ★ | ★ | ★ | 6 | 6 | ⬜+⬜+⬜+    |
| Liu, 2001                           |   | ★ |   |   |   | ★ |   |   |   |   |   |   |   | ★ |   |   | 0 | 3 | ⬜⬜⬜⬜⬜⬜    |
| Rucklidge, 2019                     | ★ |   | ★ | ★ |   |   |   |   |   |   |   | ★ | ★ | ★ |   | ★ | 3 | 4 | ⬜⬜⬜+⬜⬜    |
| Skalny, 2021                        | ★ | ★ | ★ | ★ | ★ |   | ★ | ★ | ★ | ★ | ★ |   | ★ | ★ |   | ★ | 7 | 6 | ⬜+⬜+⬜+⬜+  |
| Wang, 2021b                         | ★ | ★ | ★ | ★ | ★ | ★ |   | ★ | ★ | ★ | ★ |   | ★ | ★ | ★ | ★ | 7 | 7 | ⬜+⬜+⬜+⬜+  |
| Yektas, 2019                        | ★ | ★ |   |   |   | ★ |   |   | ★ |   | ★ | ★ | ★ |   | ★ | ★ | 5 | 4 | ⬜⬜+⬜+⬜⬜   |
| <b>Kinurenine pathway</b>           |   |   |   |   |   |   |   |   |   |   |   |   |   |   |   |   |   |   |           |
| Dolina, 2014                        |   |   |   |   |   |   |   |   |   |   | ★ |   | ★ |   | ★ | ★ | 3 | 1 | ⬜⬜⬜+⬜⬜    |
| Evangelisti, 2017                   | ★ | ★ | ★ | ★ | ★ | ★ | ★ | ★ | ★ | ★ | ★ | ★ | ★ | ★ | ★ | ★ | 8 | 8 | ⬜+⬜+⬜+⬜+  |
| Hoshino, 1985                       | ★ | ★ | ★ |   |   |   |   |   |   |   |   |   |   |   | ★ |   | 3 | 1 | ⬜⬜⬜⬜⬜⬜    |
| Kilany, 2022                        | ★ |   | ★ |   |   |   |   |   | ★ | ★ | ★ | ★ | ★ |   | ★ | ★ | 6 | 3 | ⬜⬜+⬜+⬜⬜   |
| Molina-Carballo, 2021               | ★ | ★ | ★ | ★ |   |   | ★ |   | ★ |   | ★ | ★ | ★ | ★ | ★ | ★ | 7 | 5 | ⬜+⬜+⬜+⬜+  |
| Oades, 2010a                        | ★ | ★ | ★ | ★ | ★ | ★ | ★ | ★ | ★ | ★ |   |   | ★ | ★ | ★ | ★ | 7 | 7 | ⬜+⬜⬜+⬜+⬜+ |
| Oades, 2010b                        | ★ | ★ | ★ | ★ | ★ | ★ | ★ | ★ | ★ | ★ |   |   | ★ | ★ | ★ | ★ | 7 | 7 | ⬜+⬜⬜+⬜+⬜+ |
| Sağlam, 2021                        | ★ | ★ | ★ | ★ | ★ | ★ | ★ | ★ | ★ | ★ | ★ | ★ | ★ | ★ | ★ | ★ | 8 | 8 | ⬜+⬜+⬜+⬜+  |
| <b>Neurotransmitters metabolism</b> |   |   |   |   |   |   |   |   |   |   |   |   |   |   |   |   |   |   |           |
| Baker, 1991                         | ★ | ★ | ★ |   |   | ★ | ★ | ★ | ★ |   |   |   | ★ | ★ |   |   | 5 | 4 | ⬜+⬜⬜⬜⬜⬜   |
| Baker, 1993                         | ★ | ★ | ★ |   |   | ★ | ★ | ★ | ★ | ★ |   |   | ★ | ★ |   |   | 5 | 5 | ⬜+⬜⬜⬜⬜⬜   |
| Chatterjee, 2022                    | ★ | ★ |   |   |   |   | ★ | ★ |   |   |   | ★ | ★ | ★ | ★ |   | 4 | 4 | ⬜⬜⬜⬜⬜⬜    |
| Hanna, 1996                         | ★ | ★ |   |   | ★ |   | ★ | ★ | ★ |   | ★ | ★ | ★ | ★ | ★ |   | 7 | 4 | ⬜⬜+⬜+⬜+⬜+ |
| Khan, 1981                          | ★ | ★ |   |   |   | ★ |   | ★ | ★ |   |   |   | ★ |   |   |   | 3 | 3 | ⬜⬜⬜⬜⬜⬜    |

|                           |   |   |   |   |   |   |   |   |   |   |   |   |   |   |   |   |   |   |   |   |   |   |
|---------------------------|---|---|---|---|---|---|---|---|---|---|---|---|---|---|---|---|---|---|---|---|---|---|
| Konrad, 2003              | ★ | ★ |   | ★ | ★ | ★ | ★ | ★ | ★ | ★ | ★ | ★ | ★ | ★ | ★ | ★ | 7 | 8 | + | + | + | + |
| Moriarty, 2011            |   |   |   |   |   |   |   |   |   |   |   |   | ★ | ★ |   |   | 1 | 1 | - | - | - | - |
| Oades, 1998               | ★ | ★ |   |   |   |   |   | ★ | ★ | ★ | ★ | ★ | ★ | ★ | ★ | ★ | 5 | 5 | - | + | + | - |
| Roessner, 2007            | ★ | ★ |   |   |   | ★ | ★ | ★ | ★ | ★ | ★ |   | ★ | ★ | ★ | ★ | 6 | 6 | - | + | + | + |
| Shekim, 1987              | ★ | ★ |   |   |   |   | ★ | ★ |   |   |   |   | ★ | ★ | ★ | ★ | 4 | 4 | - | - | + | - |
| Other metabolic processes |   |   |   |   |   |   |   |   |   |   |   |   |   |   |   |   |   |   |   |   |   |   |
| Büber, 2016               | ★ | ★ | ★ | ★ | ★ | ★ | ★ | ★ | ★ | ★ |   |   | ★ | ★ | ★ | ★ | 7 | 7 | + | - | + | + |
| Fernández-López, 2020     | ★ | ★ | ★ | ★ |   |   |   |   |   |   | ★ | ★ | ★ | ★ | ★ | ★ | 5 | 5 | - | - | + | - |
| Molina-Carballo, 2013     | ★ | ★ | ★ | ★ |   |   |   | ★ | ★ |   |   |   | ★ | ★ | ★ | ★ | 5 | 5 | - | - | + | - |
| Sari, 2020                | ★ | ★ | ★ | ★ | ★ |   | ★ | ★ | ★ | ★ | ★ | ★ | ★ | ★ | ★ | ★ | 8 | 7 | + | + | + | + |
| Untargeted metabolomics   |   |   |   |   |   |   |   |   |   |   |   |   |   |   |   |   |   |   |   |   |   |   |
| Swann, 2023               | ★ | ★ | ★ | ★ |   | ★ | ★ | ★ | ★ | ★ | ★ | ★ | ★ | ★ | ★ | ★ | 7 | 8 | + | + | + | + |
| Tian, 2022                | ★ | ★ | ★ | ★ | ★ | ★ | ★ | ★ | ★ | ★ | ★ | ★ | ★ | ★ | ★ | ★ | 8 | 8 | + | + | + | + |
| Wang, 2021a               | ★ | ★ | ★ | ★ | ★ | ★ | ★ | ★ | ★ | ★ | ★ | ★ | ★ | ★ | ★ | ★ | 8 | 8 | + | + | + | + |

#### Traffic light plot legend:

|   | Selection        | Comparability    | Outcome          | Total              |
|---|------------------|------------------|------------------|--------------------|
| + | sum of stars 6-8 | sum of stars 3-4 | sum of stars 3-4 | sum of stars 12-16 |
| - | sum of stars 3-5 | sum of stars 2   | sum of stars 2   | sum of stars 6-11  |
| - | sum of stars 0-2 | sum of stars 0-1 | sum of stars 0-1 | sum of stars 0-5   |
